# Supplementary material for: Evaluation of molecular dynamic of films from polyurethanes aqueous dispersions
Source: Royal Society of Chemistry journal article supplement (doi:10.1039/d1ra04275k), 2002-01-01
Supplement: d1ra04275k1.pdf [file d1ra04275k1.pdf]

# Supporting Information

## **PCN-222@g-C<sub>3</sub>N<sub>4</sub> Cathodic Materials for “Signal-Off”**

### **Photoelectrochemical Sensing of kanamycin sulfate**

Wenxia Dong <sup>a</sup>, Zhongping Li <sup>a,\*</sup>, Wen Wen<sup>a</sup>, Sisi Feng <sup>c</sup>, Yuanjian Zhang <sup>d</sup>, Guangming Wen <sup>a,b\*</sup>

<sup>a</sup> School of Chemistry and Chemical Engineering, Institute of Environmental Science, Shanxi University, Taiyuan 030006, China. E-mail: zl104@sxu.edu.cn

<sup>b</sup> School of Chemistry and Chemical Engineering, Jinzhong University, Jinzhong, 030619, China

<sup>c</sup> Institute of Molecular Science, Key Laboratory of Chemical Biology and Molecular Engineering of the Education Ministry, Shanxi University, Taiyuan, Shanxi, 030006, China

<sup>d</sup> School of Chemistry and Chemical Engineering, Southeast University, Nanjing 211189, China

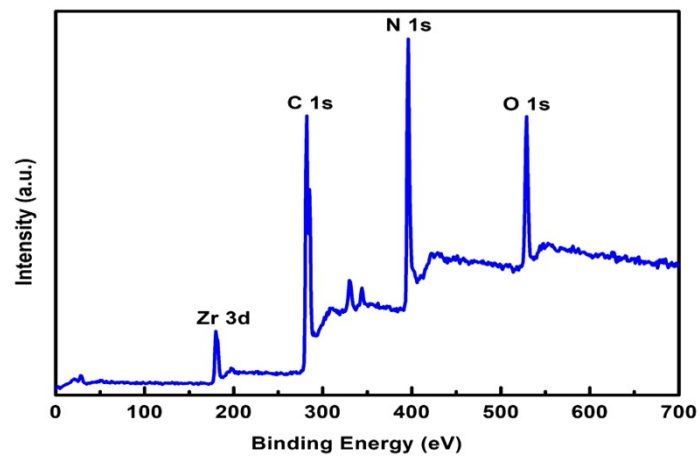

**Fig. S1** C 1s, N 1s and Zr 3d high resolution XPS of PCN-222@g-C<sub>3</sub>N<sub>4</sub>.

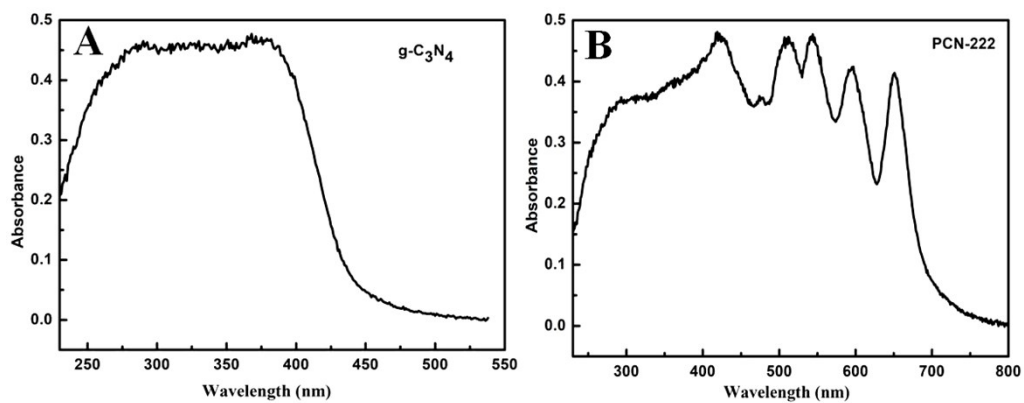

**Fig. S2** Solid UV of g-C<sub>3</sub>N<sub>4</sub> and PCN-222.

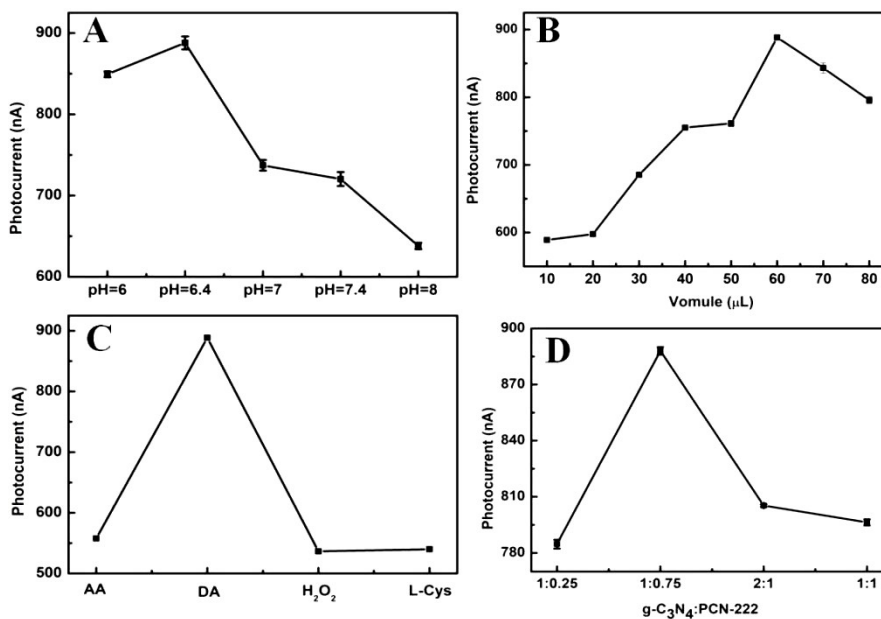

**Fig. S3** Optimization of conditions for kanamycin sulfate detection: (A) pH (B) complex modification amount (C) reducing agent and (D) ratio of g-C<sub>3</sub>N<sub>4</sub> to PCN-222. Error bars represent the standard deviation of three parallel experiments.

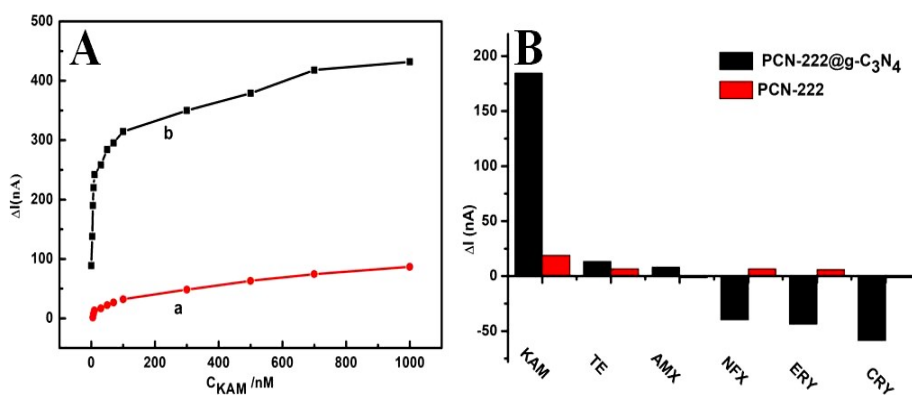

**Fig. S4** (A) reaction of different materials to KAM (a) PCN-222, (b) PCN-222@g-C<sub>3</sub>N<sub>4</sub>; (B) different materials react to different antibiotics.

**Table S1** Different methods to analyze KAM.

| Materials | Methods | Linear range | Detection limit | Refs |
|-----------|---------|--------------|-----------------|------|
|-----------|---------|--------------|-----------------|------|

|                                         |                      |              |          |           |
|-----------------------------------------|----------------------|--------------|----------|-----------|
| GO/w-g-C <sub>3</sub> N <sub>4</sub>    | photoelectrochemical | 1-230 nM     | 0.2 nM   | 1         |
| MoS <sub>2</sub>                        | electrochemical      | 0.1-100 nM   | 0.029 nM | 2         |
| GNP-KBA3-1                              | colorimetric         | 3.35-13.4 nM | 3.35nM   | 3         |
| PCN-222@g-C <sub>3</sub> N <sub>4</sub> | photoelectrochemical | 1-1000 nM    | 0.127 nM | This work |

1 R. Z. Li, Y. Liu, Cheng, L., C. Z. Yang, and J. D. Zhang, *Anal. Chem.* 2014, 86, 9372–9375.

2 Y. L. Zhou, F. Li, H. E. Wu, Y. Chen, H. S. Yin, S. Y. Ai, and J. Wang, *Sens. Actuators B Chem.* 2019, 296, 126664.

3 N. R. Ha I. P. Jung, S. H. Kim, A. R. Kim, M. Y. Yoon, *Process Biochem.* 2017, 62, 161–168.
